# Supplementary material
Source: publisher figshare collection journal article supplement (https://brill.figshare.com/articles/dataset/_/22325098)
Supplement: Supplementary file 1 [file 1]

**Phylogeny and classification of *Nesobasis* Selys, 1891 and  
*Vanuatubasis* Ober & Staniczek, 2009 (Odonata: Coenagrionidae)**

**Daniel G. Ferguson<sup>a,\*</sup>, Milen Marinov<sup>b</sup>, Natalie A. Saxton<sup>a,c,d</sup>, Bindiya Rashni<sup>e</sup> and Seth M.  
Bybee<sup>a</sup>**

<sup>a</sup>Department of Biology and Monte L. Bean Museum, Brigham Young University, 4102 LSB, Provo, UT 84602,  
USA

<sup>b</sup>Biosecurity Surveillance & Incursion Investigation Plant Health Team, Ministry for Primary Industries, 14 Sir  
William Pickering Drive, Christchurch 8053, New Zealand

<sup>c</sup>Research and Collections Division, The Cleveland Museum of Natural History, 1 Wade Oval Drive, Cleveland, OH  
44106, USA

<sup>d</sup>Department of Biology, Case Western Reserve University, 2080 Adelbert Rd., Cleveland, OH 44106, USA

<sup>e</sup>University of the South Pacific, Discipline of Biological and Chemical Sciences, School of Agriculture, Geography,  
Environment, Ocean and Natural Sciences, Laucala Campus, Fiji

\*Corresponding author; e-mail: [danferg21@gmail.com](mailto:danferg21@gmail.com)

ORCID iDs: Ferguson: 0000-0002-3376-124X; Rashni: 0000-0002-7699-9549

**Supplementary material**
